# Supplementary material for: Precise measurement of selenium isotopes by HG-MC-ICPMS using a 76–78 double-spike
Source: Royal Society of Chemistry journal article supplement (doi:10.1039/c9ja00331b), 2019-12-09
Supplement: c9ja00331b1.pdf [file c9ja00331b1.pdf]

**Precise measurement of selenium isotopes by HG-MC-ICPMS using a 76-78 double-spike**

Marie-Laure Pons<sup>a,b\*</sup>, Marc-Alban Millet<sup>c</sup>, Geoff N. Nowell<sup>d</sup>, Sambuddha Misra<sup>a,e</sup> and Helen M. Williams<sup>a</sup>

<sup>a</sup>The University of Cambridge, Department of Earth Sciences, Downing St, Cambridge CB2 3EQ, United Kingdom

<sup>b</sup>CNRS, Aix Marseille Univ, IRD, INRA, Coll France, CEREGE, 13545, Aix en Provence, France

<sup>c</sup>Cardiff University, School of Earth and Ocean Sciences, Main Building, Park Pl, Cardiff CF10 3AT, United Kingdom

<sup>d</sup>Durham University, Department of Earth Sciences, Elvet Hill, Durham DH1 3LE, United Kingdom

<sup>e</sup>Indian Institute of Science, Centre for Earth Sciences, Bengaluru, India

\*corresponding author [dr.marie.laure.pons@gmail.com](mailto:dr.marie.laure.pons@gmail.com)

**Supplementary information**

**Table S1.**  $\delta^{82/78}\text{Se}_{\text{MERCK}}$ . Merck Se solution calibration to Se NIST SRM-3149. Results obtained during all the analytical sessions.

| Analytical session # | $\delta^{82/78}\text{Se}_{\text{MERCK}}$ average of analytical session | n | 2 s.d. | $\delta^{82/78}\text{Se}_{\text{MERCK}}$ of single analyses |
|----------------------|------------------------------------------------------------------------|---|--------|-------------------------------------------------------------|
| 1                    | -0.9856                                                                | 6 | 0.0293 | -0.9877                                                     |
|                      |                                                                        |   |        | -0.9581                                                     |
|                      |                                                                        |   |        | -0.9837                                                     |
|                      |                                                                        |   |        | -0.9881                                                     |
|                      |                                                                        |   |        | -0.9981                                                     |
|                      |                                                                        |   |        | -0.9977                                                     |
| 2                    | -0.9827                                                                | 5 | 0.0240 | -0.9739                                                     |
|                      |                                                                        |   |        | -0.9839                                                     |
|                      |                                                                        |   |        | -0.9939                                                     |
|                      |                                                                        |   |        | -0.9944                                                     |
|                      |                                                                        |   |        | -0.9675                                                     |
| 3                    | -0.9860                                                                | 7 | 0.0285 | -0.9842                                                     |
|                      |                                                                        |   |        | -0.9666                                                     |
|                      |                                                                        |   |        | -0.9953                                                     |
|                      |                                                                        |   |        | -0.9853                                                     |
|                      |                                                                        |   |        | -1.0034                                                     |
|                      |                                                                        |   |        | -0.9686                                                     |
| 4                    | -0.9891                                                                | 4 | 0.0232 | -0.9975                                                     |
|                      |                                                                        |   |        | -1.0005                                                     |
|                      |                                                                        |   |        | -0.9797                                                     |
|                      |                                                                        |   |        | -0.9784                                                     |
| 5                    | -0.9964                                                                | 5 | 0.0328 | -1.0008                                                     |
|                      |                                                                        |   |        | -0.9887                                                     |
|                      |                                                                        |   |        | -0.9763                                                     |
|                      |                                                                        |   |        | -1.0207                                                     |
|                      |                                                                        |   |        | -0.9956                                                     |

| Analytical session # | $\delta^{82/78}\text{Se}_{\text{MERCK}}$ average of analytical session | n | 2 s.d.     | $\delta^{82/78}\text{Se}_{\text{MERCK}}$ of single analyses |
|----------------------|------------------------------------------------------------------------|---|------------|-------------------------------------------------------------|
| 6                    | -1.0060                                                                | 6 | 0.015<br>3 | -1.0072                                                     |
|                      |                                                                        |   |            | -1.0132                                                     |
|                      |                                                                        |   |            | -1.0015                                                     |
|                      |                                                                        |   |            | -1.0002                                                     |
|                      |                                                                        |   |            | -1.0165                                                     |
|                      |                                                                        |   |            | -0.9972                                                     |
| 7                    | -1.0155                                                                | 5 | 0.026<br>6 | -1.0323                                                     |
|                      |                                                                        |   |            | -1.0178                                                     |
|                      |                                                                        |   |            | -1.0168                                                     |
|                      |                                                                        |   |            | -1.0158                                                     |
|                      |                                                                        |   |            | -0.9950                                                     |
| 8                    | -0.9780                                                                | 7 | 0.030<br>4 | -0.9779                                                     |
|                      |                                                                        |   |            | -0.9947                                                     |
|                      |                                                                        |   |            | -0.9648                                                     |
|                      |                                                                        |   |            | -0.9830                                                     |
|                      |                                                                        |   |            | -0.9993                                                     |
|                      |                                                                        |   |            | -0.9613                                                     |
| 9                    | -1.0268                                                                | 5 | 0.029<br>8 | -0.9650                                                     |
|                      |                                                                        |   |            | -1.0384                                                     |
|                      |                                                                        |   |            | -1.0270                                                     |
|                      |                                                                        |   |            | -1.0219                                                     |
|                      |                                                                        |   |            | -1.0045                                                     |
| 10                   | -0.9865                                                                | 4 | 0.030<br>7 | -1.0421                                                     |
|                      |                                                                        |   |            | -0.9790                                                     |
|                      |                                                                        |   |            | -0.9697                                                     |
|                      |                                                                        |   |            | -0.9925                                                     |
|                      |                                                                        |   |            | -1.0047                                                     |

| Analytical session # | $\delta^{82/78}\text{Se}_{\text{MERCK}}$ average of analytical session | n | 2 s.d. | $\delta^{82/78}\text{Se}_{\text{MERCK}}$ of single analyses |
|----------------------|------------------------------------------------------------------------|---|--------|-------------------------------------------------------------|
| 11                   | -0.9578                                                                | 5 | 0.0292 | -0.9537                                                     |
|                      |                                                                        |   |        | -0.9683                                                     |
|                      |                                                                        |   |        | -0.9773                                                     |
|                      |                                                                        |   |        | -0.9466                                                     |
|                      |                                                                        |   |        | -0.9430                                                     |
| 12                   | -0.9697                                                                | 9 | 0.0296 | -0.9644                                                     |
|                      |                                                                        |   |        | -0.9691                                                     |
|                      |                                                                        |   |        | -0.9645                                                     |
|                      |                                                                        |   |        | -0.9644                                                     |
|                      |                                                                        |   |        | -0.9871                                                     |
|                      |                                                                        |   |        | -0.9682                                                     |
|                      |                                                                        |   |        | -0.9532                                                     |
|                      |                                                                        |   |        | -0.9644                                                     |
|                      |                                                                        |   |        | -0.9937                                                     |
|                      |                                                                        |   |        | -0.9644                                                     |
| -0.9947              |                                                                        |   |        |                                                             |
| -0.9475              |                                                                        |   |        |                                                             |
| 13                   | -0.9799                                                                | 3 | 0.0247 | -0.9741                                                     |
|                      |                                                                        |   |        | -0.9941                                                     |
|                      |                                                                        |   |        | -0.9715                                                     |
| 14                   | -0.9911                                                                | 4 | 0.0162 | -1.0015                                                     |
|                      |                                                                        |   |        | -0.9910                                                     |
|                      |                                                                        |   |        | -0.9903                                                     |
|                      |                                                                        |   |        | -0.9817                                                     |
| 15                   | -0.9836                                                                | 9 | 0.0236 | -0.9882                                                     |
|                      |                                                                        |   |        | -0.9812                                                     |
|                      |                                                                        |   |        | -0.9992                                                     |
|                      |                                                                        |   |        | -0.9701                                                     |
|                      |                                                                        |   |        | -0.9812                                                     |
|                      |                                                                        |   |        | -1.0046                                                     |
| -0.9718              |                                                                        |   |        |                                                             |

-0.9890  
-0.9670  
-0.9724  
-0.9881  
-0.9902

---
